# Supplementary material for: Diet induced changes in the microbiota and cell composition of rabbit gut associated lymphoid tissue (GALT)
Source: PubMed Central journal article supplement (PMC6148544; doi:10.1038/s41598-018-32484-1), 2018-09-20

## **Diet induced changes in the microbiota and cell composition of rabbit gut associated lymphoid tissue (GALT)**

Rakel Arrazuria<sup>1</sup>. Valentín Pérez<sup>2</sup>. Elena Molina<sup>1</sup>. Ramón A. Juste<sup>1^</sup>. Ehsan Khafipour<sup>3,4</sup>. Natalia Elguezabal<sup>1\*</sup>

<sup>1</sup>Department of Animal Health. NEIKER-Instituto Vasco de Investigación y Desarrollo Agrario. Derio. Bizkaia. Spain

<sup>2</sup>Department of Animal Health. Faculty of Veterinary Medicine. University of Leon. Leon. Spain.

<sup>3</sup>Department of Animal Science. University of Manitoba. Winnipeg. MB. Canada 10

<sup>4</sup>Department of Medical Microbiology. University of Manitoba. Winnipeg. MB. Canada

<sup>^</sup>Current address: SERIDA. Agri-food Research and Development Regional Service. Villaviciosa. Asturias. Spain

**Supplementary Table 1.** Details of the primary antibodies and procedures used in the immunohistochemistry.

| <b>Antigen<br/>(Clone)</b> | <b>Target</b>         | <b>Specificity</b>                                                                                                                                                      | <b>Epitope<br/>demasking</b>                 | <b>Dilution</b> |
|----------------------------|-----------------------|-------------------------------------------------------------------------------------------------------------------------------------------------------------------------|----------------------------------------------|-----------------|
| Calprotectin<br>(MAC 387)  | Myeloid<br>Histiocyte | Circulating (and emigrated) neutrophils and monocytes. as well as a subset of reactive tissue macrophages recently recruited.                                           | Heat mediated<br>AR. EDTA<br>buffer. pH 9    | 1/200           |
| Vimentin<br>(V9)           | Mesenchymal<br>cells  | M cells of rabbit gut-associated lymphoid tissue (protein of the cytoskeleton) <sup>1</sup> . Highly expressed in fibroblasts. some expression in T- and B-lymphocytes. | Heat mediated<br>AR. Citrate<br>buffer. pH 6 | 1/100           |
| CD3<br>(F7.2.38)           | T cells               | T cells. thymocytes. and activated natural killer cells                                                                                                                 | Heat mediated<br>AR. Citrate<br>buffer. pH 6 | 1/200           |

AR: Antigen Retrieval

**Supplementary Table 2.** Animal weight parameters

**(a)** Weight at different experimental periods

| Diet     |      | Time (weeks) |        |        |        |        |        |        |        |
|----------|------|--------------|--------|--------|--------|--------|--------|--------|--------|
|          |      | 0            | 7      | 11     | 16     | 20     | 24     | 27     | 31     |
| A        | Mean | 1.769        | 2.756  | 3.099  | 3.510  | 3.801  | 4.143  | 4.344  | 4.463  |
|          | SEM  | 0.061        | 0.0449 | 0.1083 | 0.1340 | 0.1306 | 0.1398 | 0.1517 | 0.1462 |
| B        | Mean | 2.230        | 3.038  | 3.457  | 3.885  | 4.232  | 4.518  | 4.489  | 4.620  |
|          | SEM  | 0.1109       | 0.0982 | 0.1246 | 0.1941 | 0.2175 | 0.0292 | 0.2225 | 0.2194 |
| <i>p</i> |      | 0.07*        | 0.031* | 0.062* | 0.151  | 0.128  | 0.280  | 0.605  | 0.568  |

**(b)** Mean weight increase along different experimental periods.

| Diet     |      | Time intervals (weeks) |        |        |         |         |         |         |        |
|----------|------|------------------------|--------|--------|---------|---------|---------|---------|--------|
|          |      | w7-w0                  | w11-w7 | w11-w0 | w24-w20 | w27-w24 | w27-w20 | w31-w27 | w31-w0 |
| A        | Mean | 0.987                  | 0.343  | 1.330  | 0.342   | 0.201   | 0.543   | 0.119   | 2.694  |
|          | SEM  | 0.0566                 | 0.0943 | 0.1436 | 0.1146  | 0.0334  | 0.0958  | 0.0099  | 0.1832 |
| B        | Mean | 0.808                  | 0.419  | 1.227  | 0.286   | -0.029  | 0.257   | 0.131   | 2.390  |
|          | SEM  | 0.0915                 | 0.0879 | 0.1338 | 0.0897  | 0.0767  | 0.0194  | 0.0146  | 0.2658 |
| <i>p</i> |      | 0.135                  | 0.572  | 0.614  | 0.711   | 0.025*  | 0.019*  | 0.516   | 0.374  |

SEM: standard error of the mean. w: week. *p*: *p* values of Student T-test. \*significant differences among groups.

**Supplementary Figure 1. Experimental design (a) and post-mortem sampling (b).**

**(a) Experimental design**

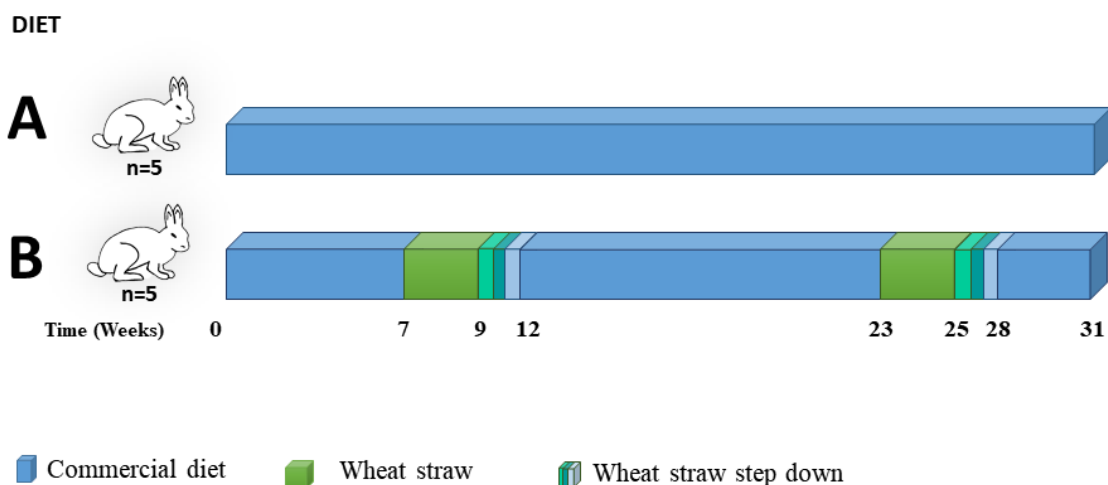

**Nutrient composition:** Commercial diet (90.26% of dry matter, 16.3% of crude protein, 3.04% of crude fat, 14.36% of crude fibre and 7.04% of crude ash) and wheat straw (93.3% of dry matter, 2.69% of crude protein, 1.02% of crude fat, 35.05% of crude fibre and 8.40% of crude ash).

**(b) Post-mortem sampling organs**

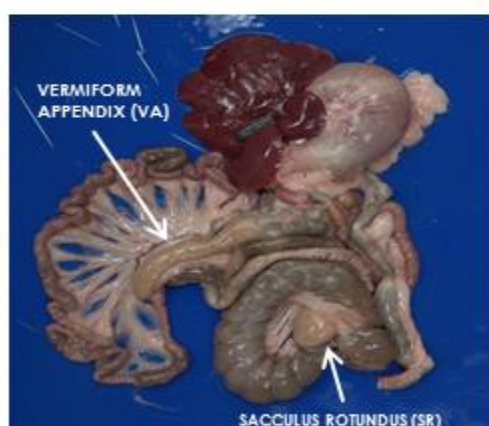

**Supplementary Figure 2.** Mean weight of diet groups at different time periods. Error bars indicate standard error of the mean (SEM).

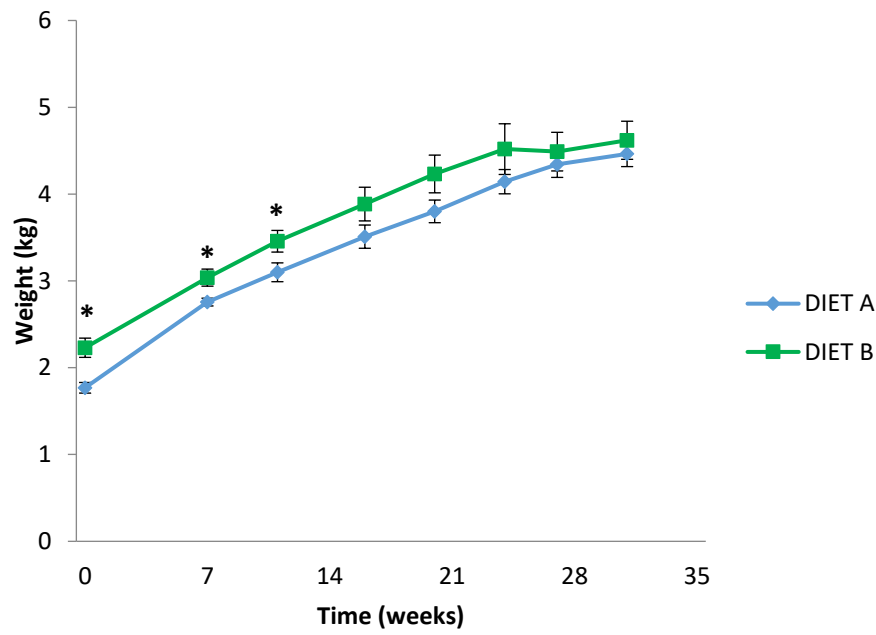

\*significant differences among groups  $p < 0,05$

**Supplementary Figure 3.** Lymphoid tissue microbiota rarefaction curve generated using Observed species (richness). Samples have been rarified at an even depth of 12.400 sequences per sample. Error bars indicate the 95% confidence intervals. SR\_A= Sacculus Rotundus Diet A; SR\_B= Sacculus Rotundus Diet B; VA\_A= Vermiform Appendix Diet A; VA\_B= Vermiform Appendix Diet B.

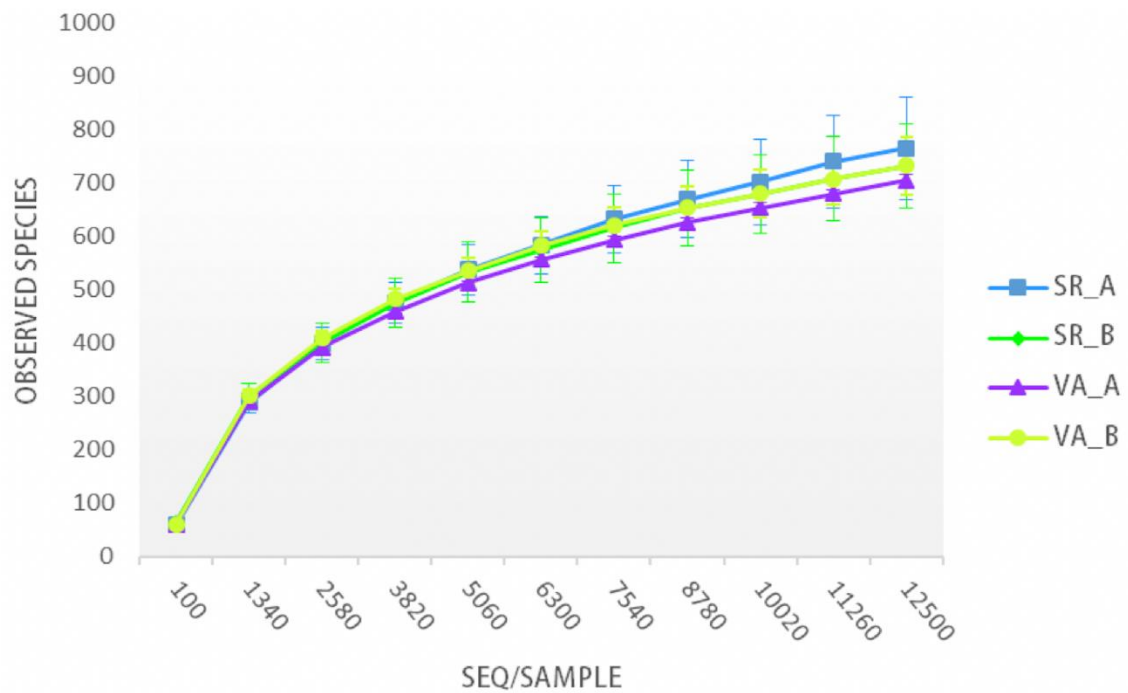

**Supplementary Figure 4.** Sacculus Rotundus and Vermiform Appendix alpha-diversity; richness(Chao1) and diversity (Shannon and Simpson) indices boxplot.

**(a) Sacculus rotundus**

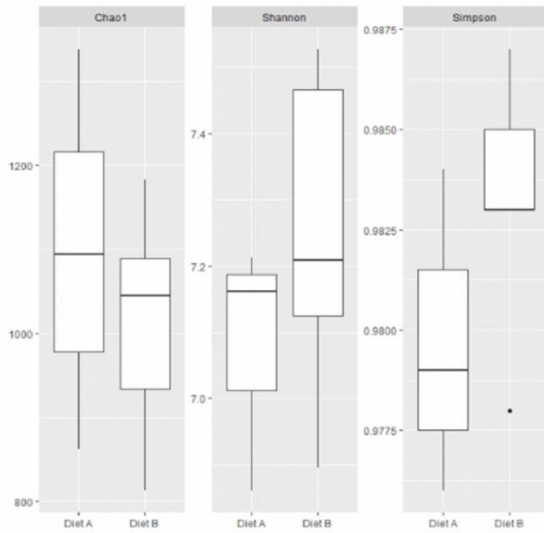

**(b) Vermiform appendix**

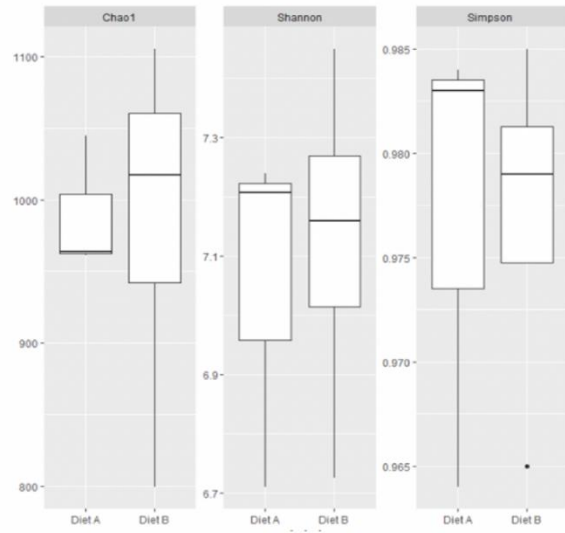

Supplement: 41598_2018_32484_MOESM1_ESM.pdf [file 41598_2018_32484_MOESM1_ESM.pdf]
